# Supplementary material
Source: publisher figshare collection journal article supplement (https://acs.figshare.com/ndownloader/files/7619272)
Supplement: Supplementary file 1 [file 7619272]

## *Supporting Information*

# **Graphene Oxide-Induced Perturbation to Plasma Membrane and Cytoskeletal Meshwork Sensitize Cancer Cells to Chemotherapeutic Agents**

Jianqiang Zhu,<sup>†,‡</sup> Ming Xu,<sup>‡,\*</sup> Ming Gao,<sup>‡</sup> Zhihong Zhang,<sup>†</sup> Yong Xu,<sup>†</sup> Tian Xia,<sup>§</sup> Sijin Liu,<sup>‡,\*</sup>

<sup>†</sup> Department of Urology, the Second Hospital of Tianjin Medical University, Tianjin Institute of Urology, Tianjin 300211, China.

<sup>‡</sup> State Key Laboratory of Environmental Chemistry and Ecotoxicology, Research Center for Eco-Environmental Sciences, Chinese Academy of Sciences, Beijing 100085, China.

<sup>§</sup> Division of NanoMedicine, Department of Medicine, University of California, Los Angeles, California 90095, United States.

\* Corresponding authors: Sijin Liu or Ming Xu. Tel: 8610-62849330; E-mail: sjliu@rcees.ac.cn and mingxu@rcees.ac.cn.

# SUPPLEMENTARY FIGURE AND FIGURE LEGEND

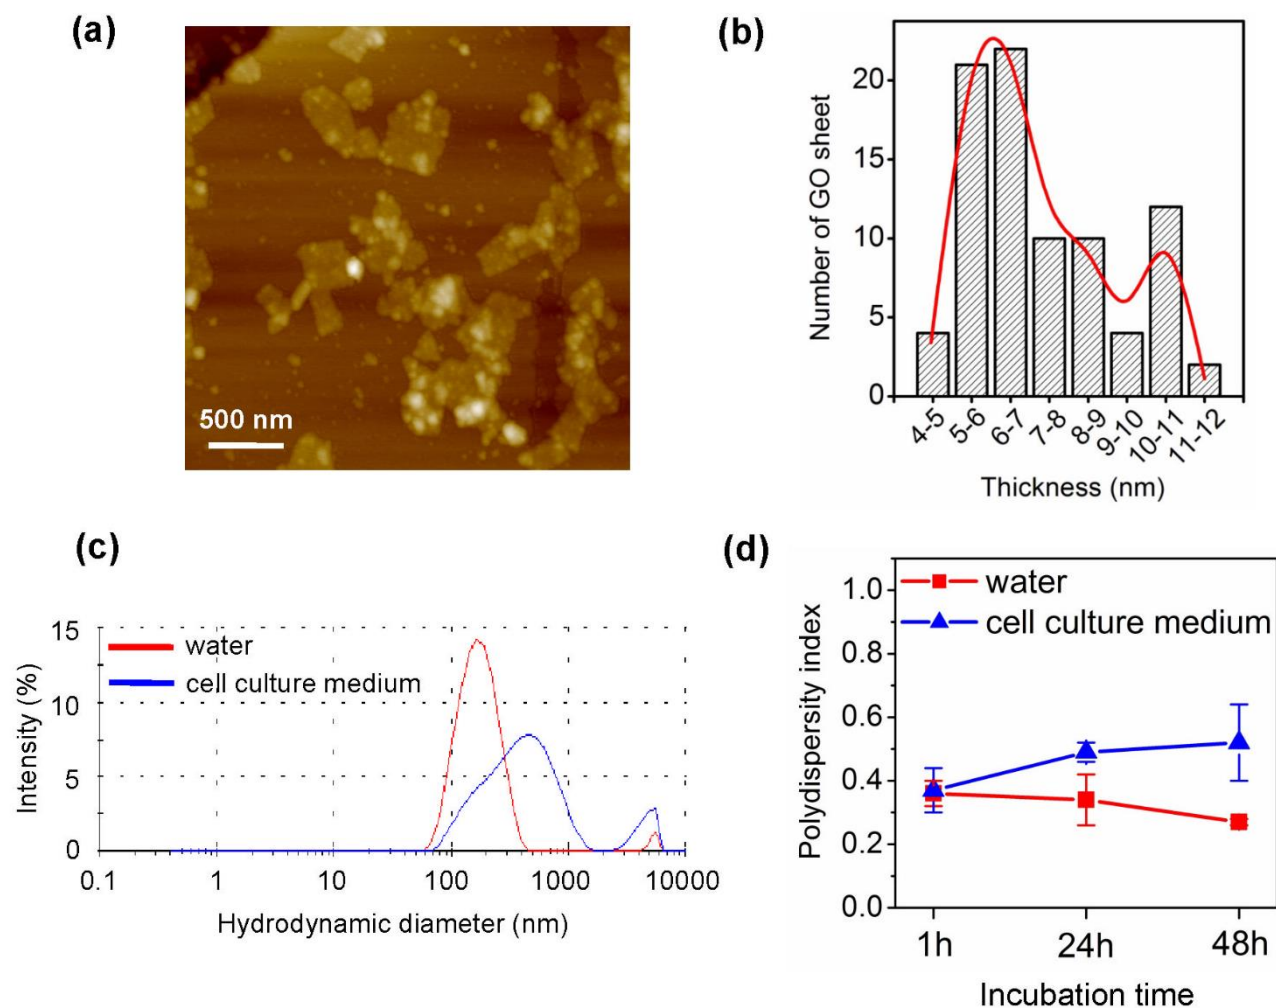

**Figure S1.** Characterization of GO materials in deionized water and cell culture medium. (a) A representative AFM image illustrating GO sheets after 24 h incubation in culture medium. (b) Thickness of GO sheets after 24 h incubation in culture medium (the number of total GO sheets = 85). (c) Hydrodynamic diameter of GO sheets in deionized water and culture medium post 24 h incubation. (d) Polydispersity index of GO sheets in deionized water and culture medium after 1, 24 and 48 h incubation (n=3).

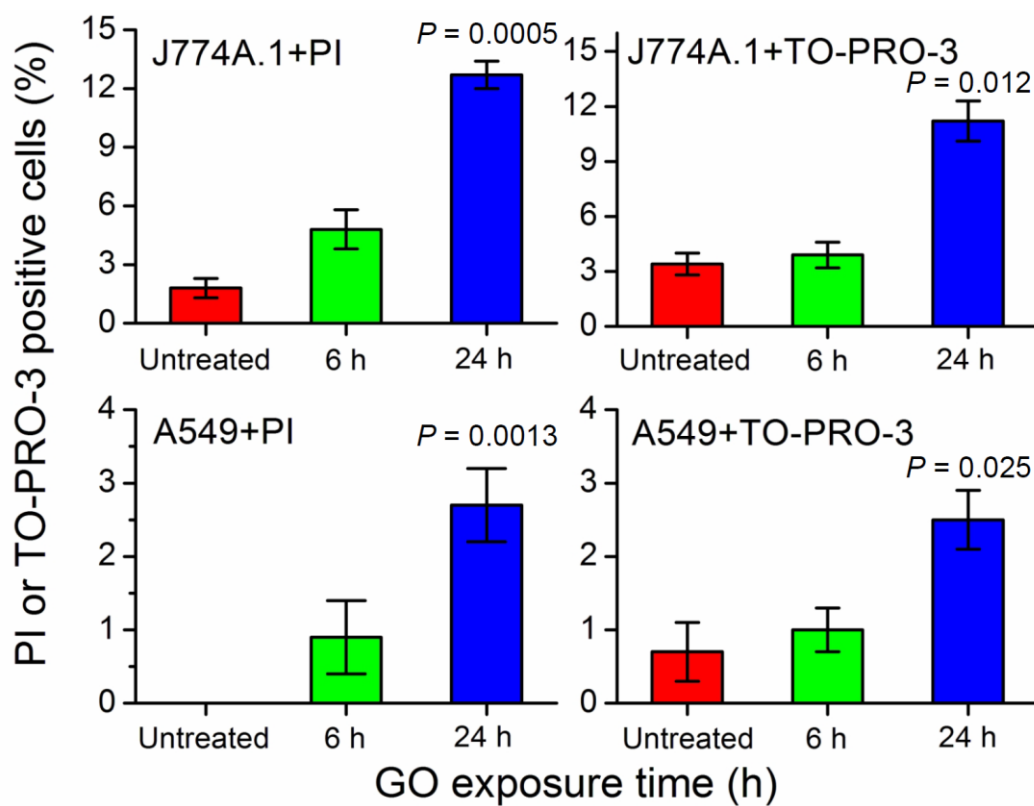

**Figure S2.** Percentage of PI or TO-PRO-3 positive cells for J774A.1 or A549 after 6 and 24 h GO treatment at 4 or 10  $\mu\text{g/mL}$ , respectively.

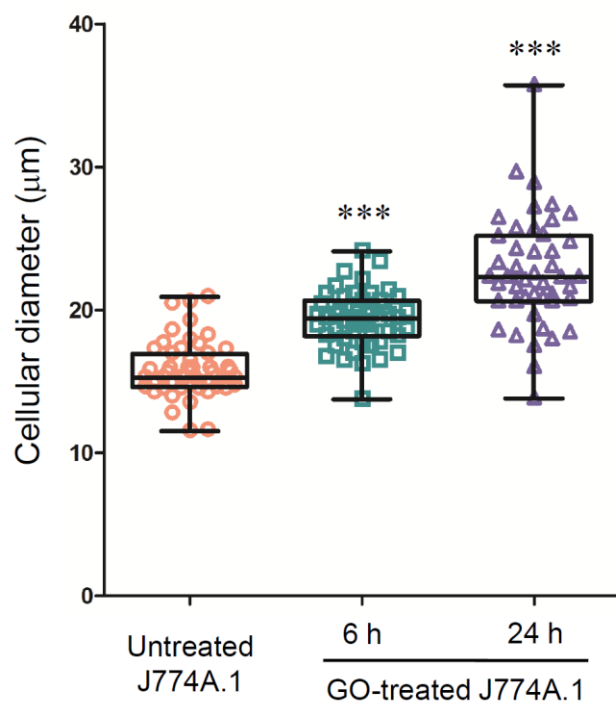

**Figure S3.** Changes of the cellular size for J774A.1 cells after 6 and 24 h GO treatment. The cellular diameter was measured through CLSM analysis (n = 45).

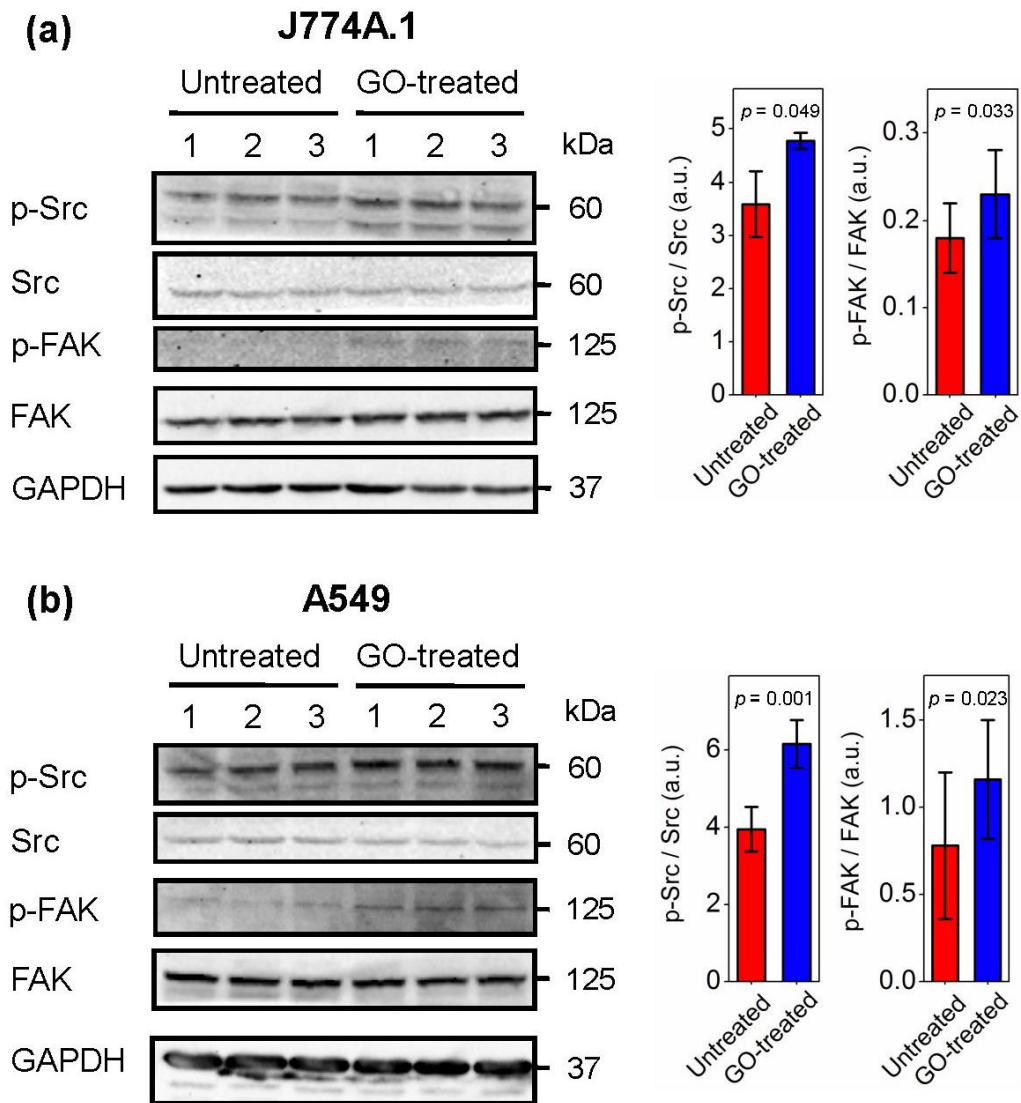

**Figure S4.** The activation of the integrin-associated FAK/Src complex by GO. Western blot analysis of p-Src, Src, p-FAK and FAK in untreated and GO-treated (a) J774A.1 and (b) A549 cells. J774A.1 and A549 cells were treated with GO at 4 and 10  $\mu\text{g/mL}$  for 6 h, respectively. There are 3 biological replicates in each group ( $n = 3$ ). Quantified data were shown in the left panels ( $n = 3$ ), compared to untreated cells.

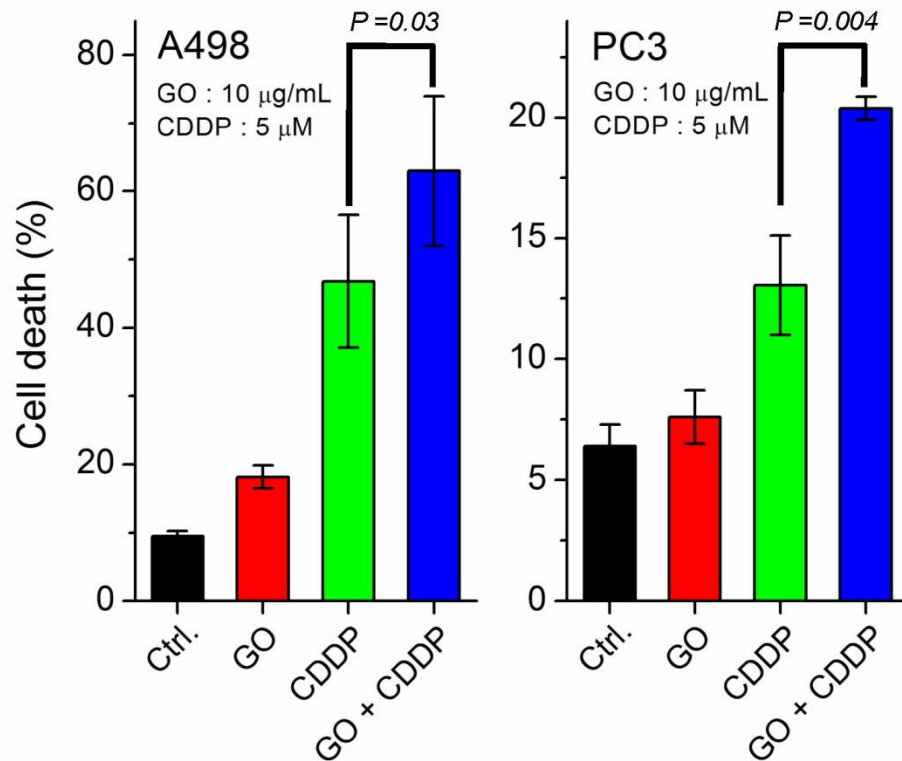

**Figure S5.** Cell death assay through FACS analysis with FITC-Annexin V and PI staining. A498 and PC3 cells were pretreated with GO at 10 µg/mL for 24 h, followed by PBS washing, and were then exposed to CDDP at 5 µM for 24 h ( $n = 4$ ), respectively. For comparison, cells were also individually treated with GO at the same concentrations ( $n = 4$ ).

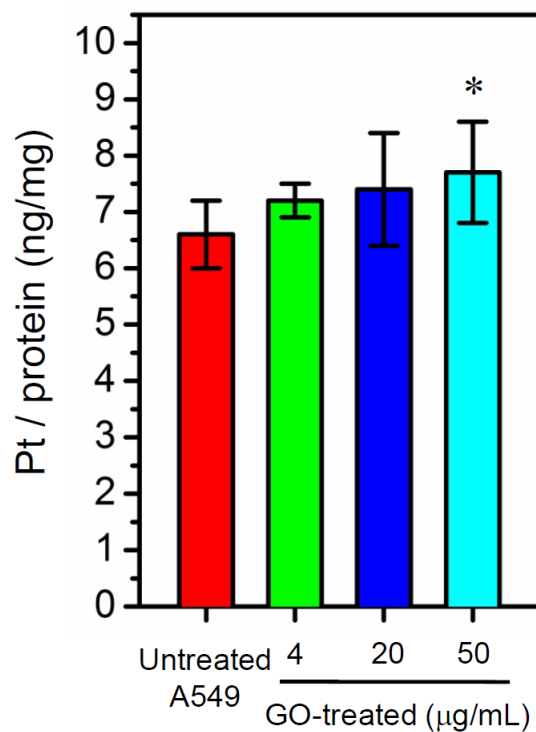

**Figure S6.** Intracellular mass of CDDP, as characterized by the intracellular concentration of Pt. A549 cells were pretreated with GO at 4, 20 and 50  $\mu\text{g/mL}$  for 24 h, and were then exposed to CDDP at 5  $\mu\text{M}$  for 24 h. The intracellular concentration of Pt was determined by ICP-MS ( $n = 3$ ). Asterisk (\*) denotes  $P < 0.05$ , compared to untreated cells.
